# Supplementary material
Source: MDPI journal article supplement (https://www.mdpi.com/2413-8851/6/1/11)

# A Geometric Classification of World Urban Road Networks

Mohamed Badhrudeen, Sybil Derrible, Trivik Verma, Amirhassan Kermanshah, and Angelo Furno

| Content                                                                               | Page |
|---------------------------------------------------------------------------------------|------|
| <b>Figure S1:</b> Degree distribution of all 80 cities                                | 2    |
| <b>Figure S2:</b> Link length distribution of all 80 cities                           | 3    |
| <b>Figure S3:</b> Street intersection angle distribution of all 80 cities             | 4    |
| <b>Figure S4:</b> Silhouette score measure to find optimal number of clusters.        | 5    |
| <b>Figure S5:</b> Sum of squared distance measure to find optimal number of clusters. | 6    |

Figure S1: Degree distribution of all 80 cities

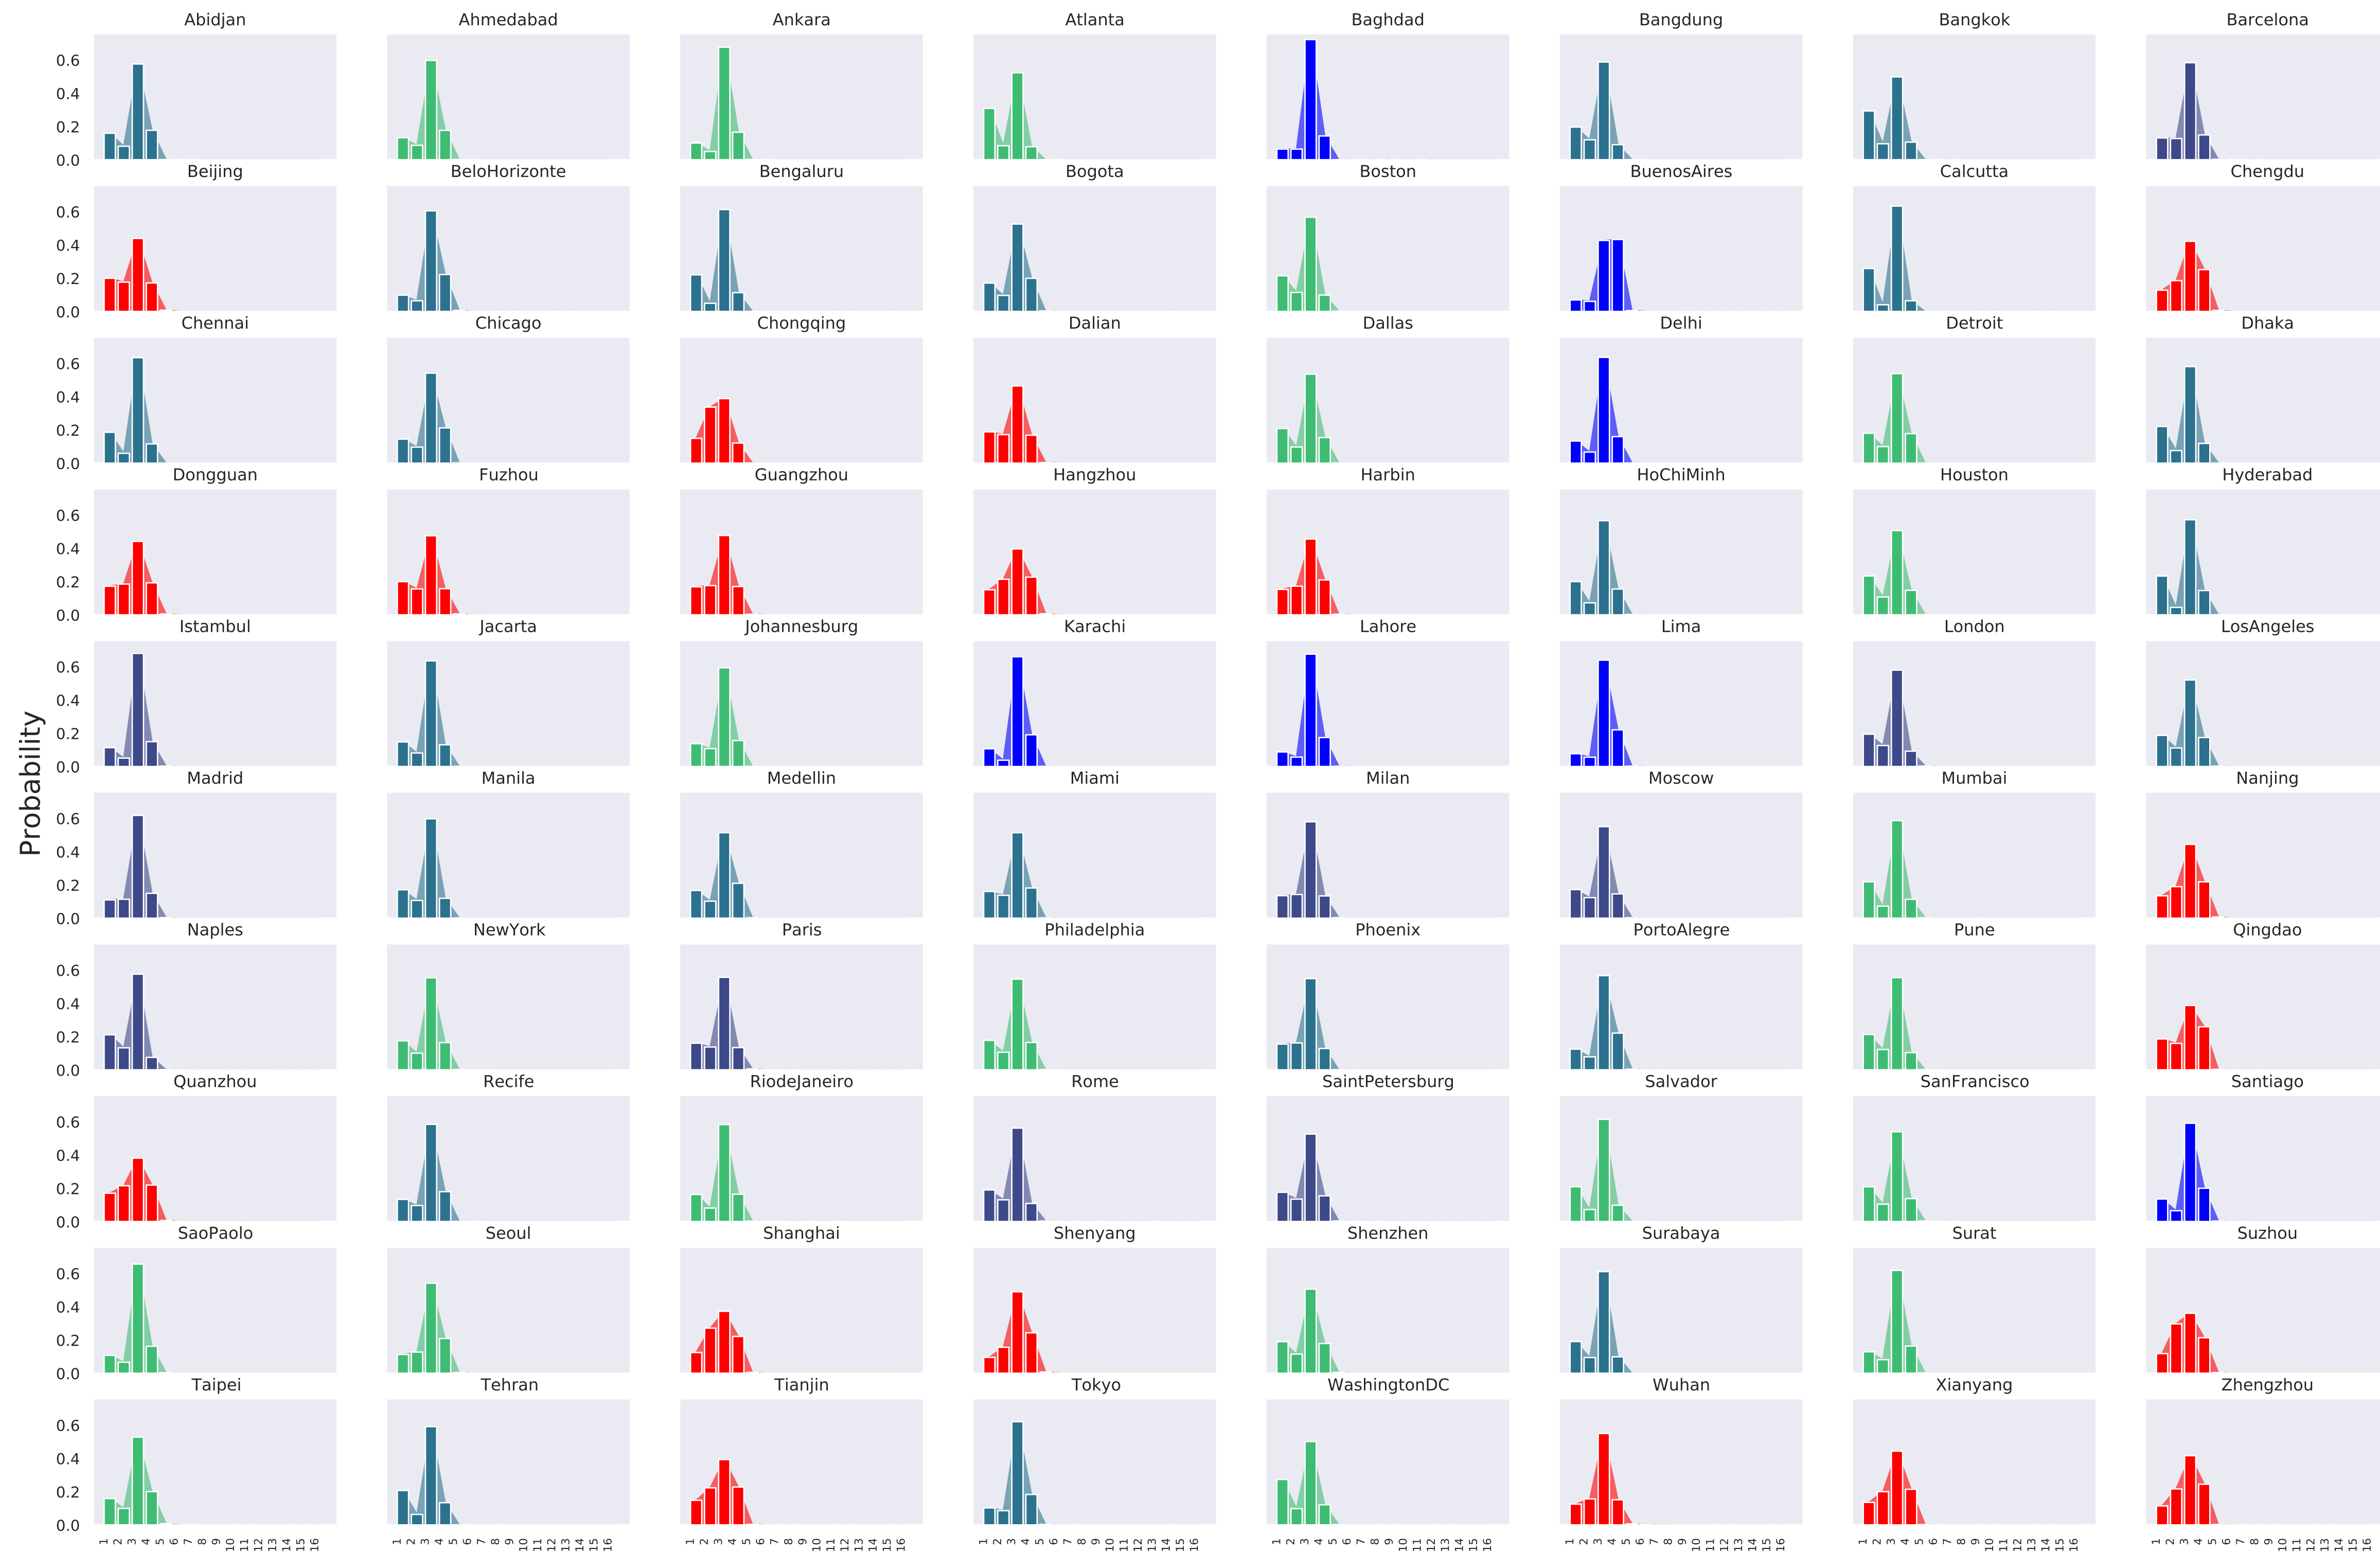

Figure S2: Link length distribution of all 80 cities

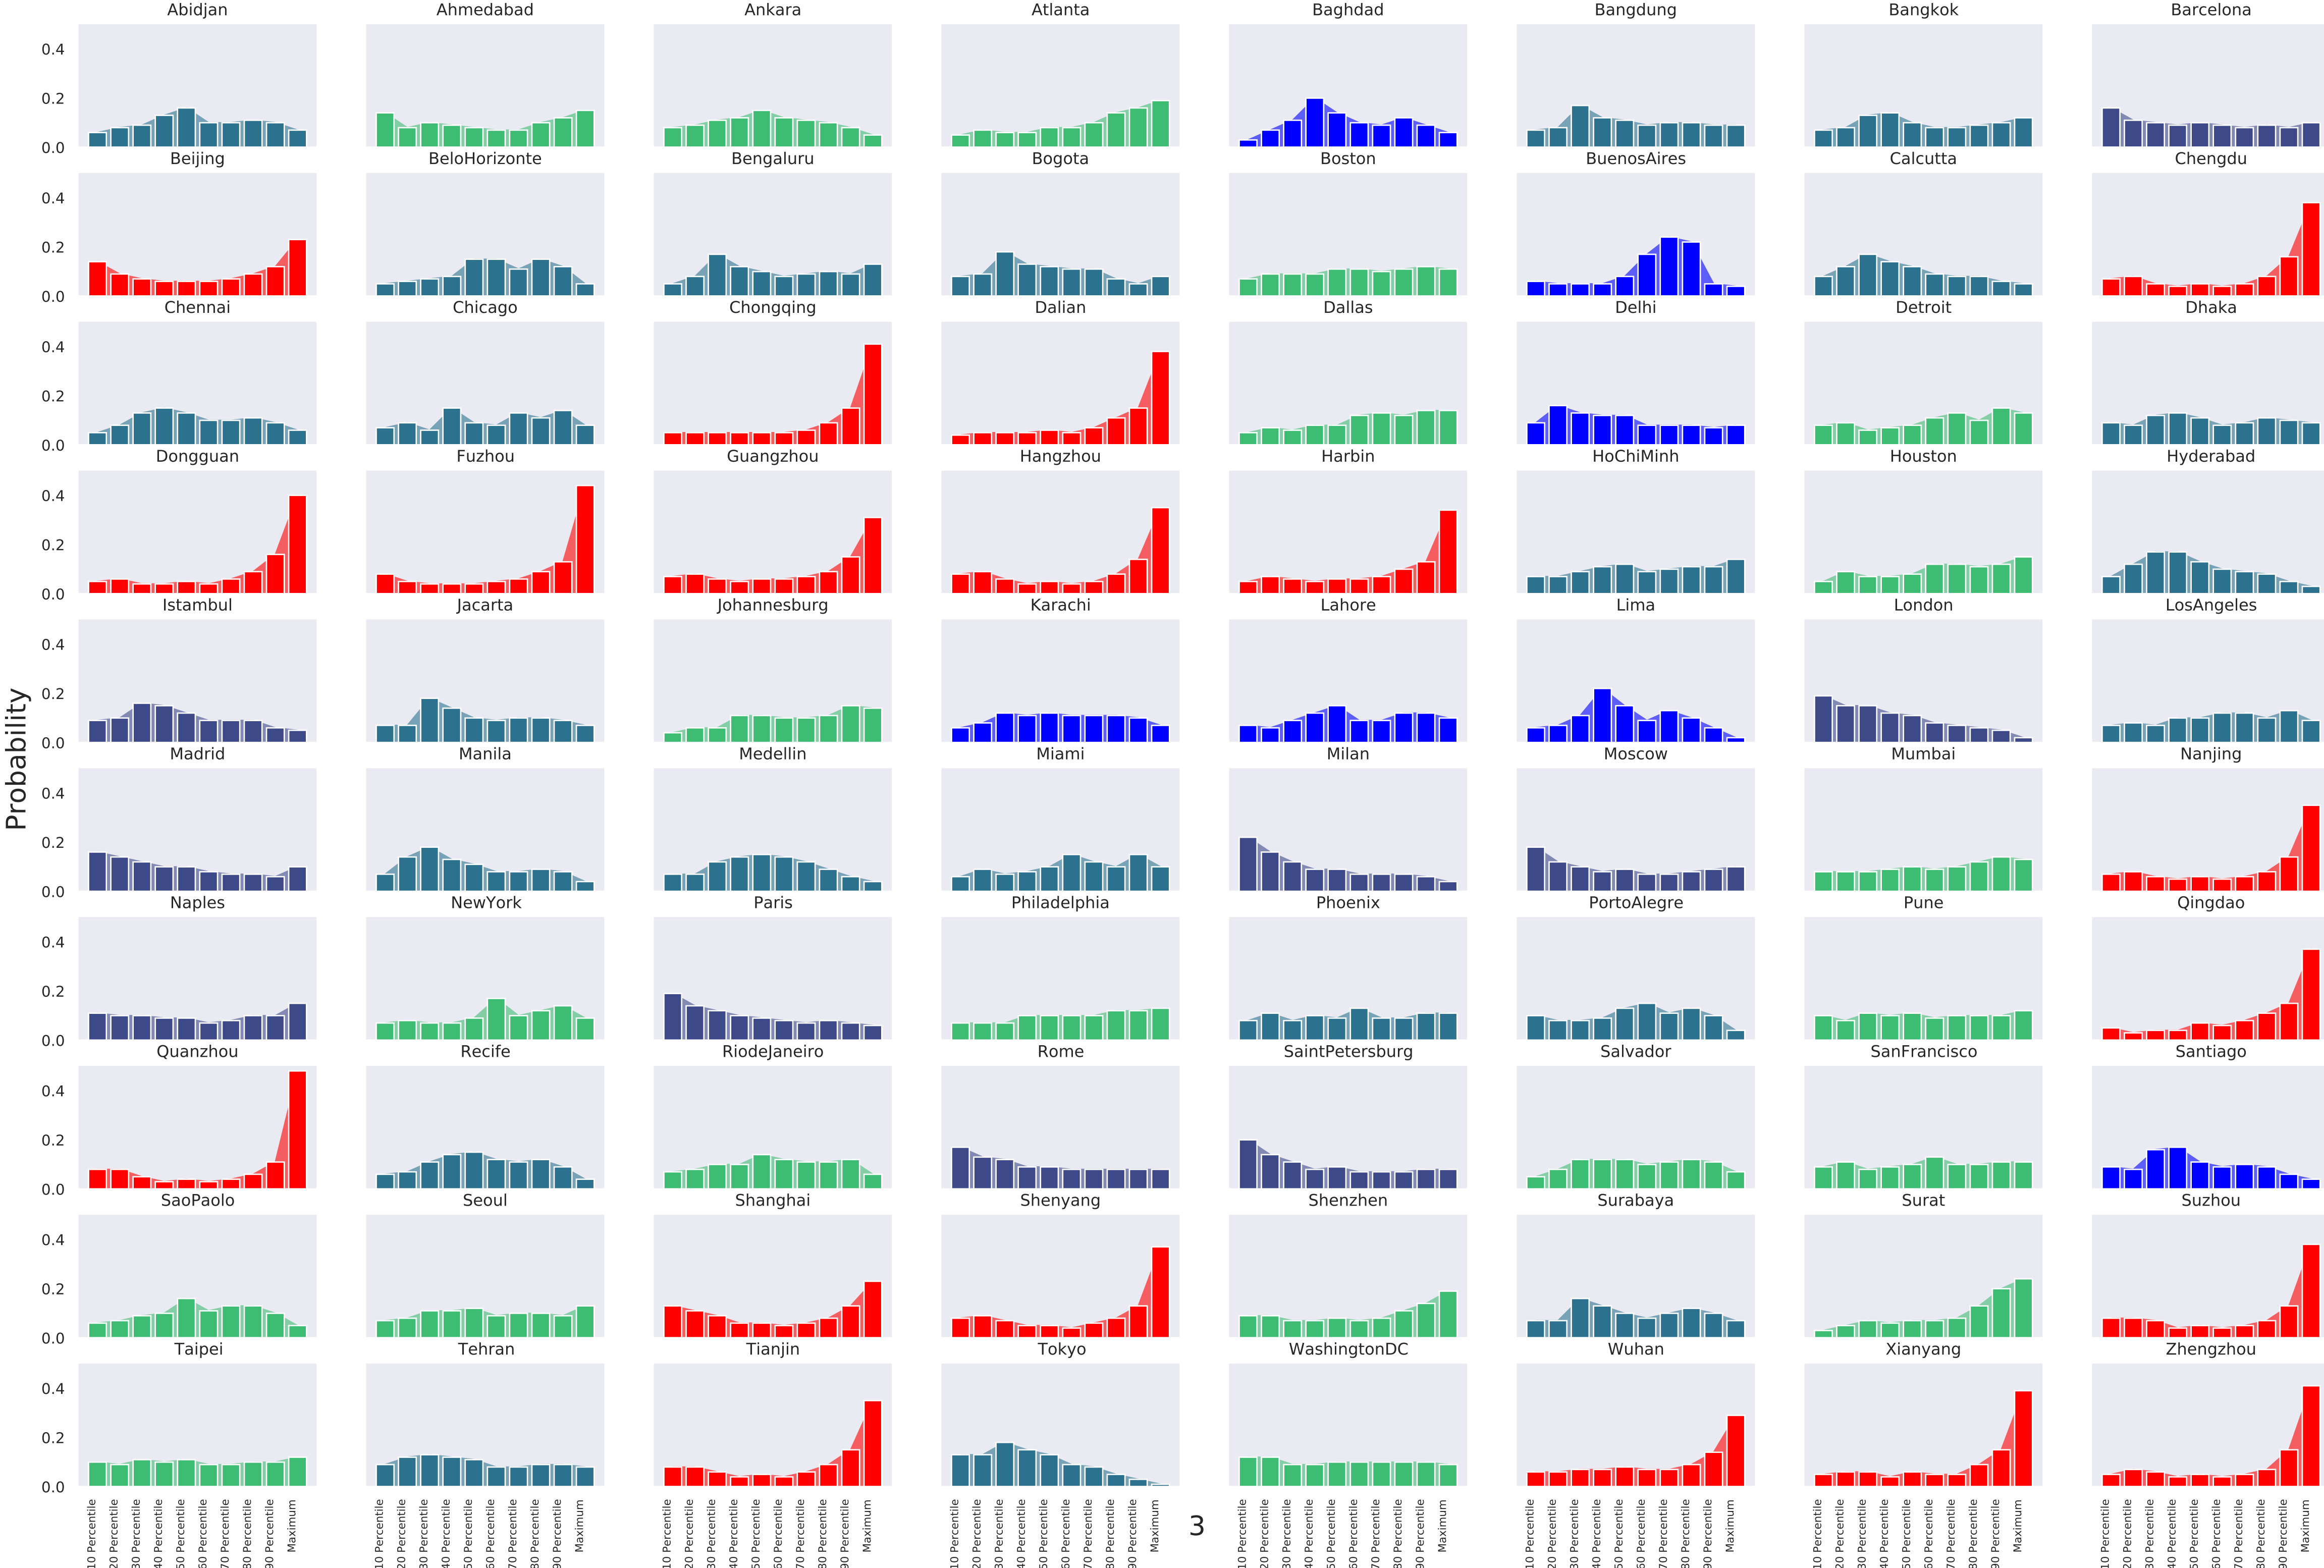

Figure S3: Street intersection angle distribution of all 80 cities

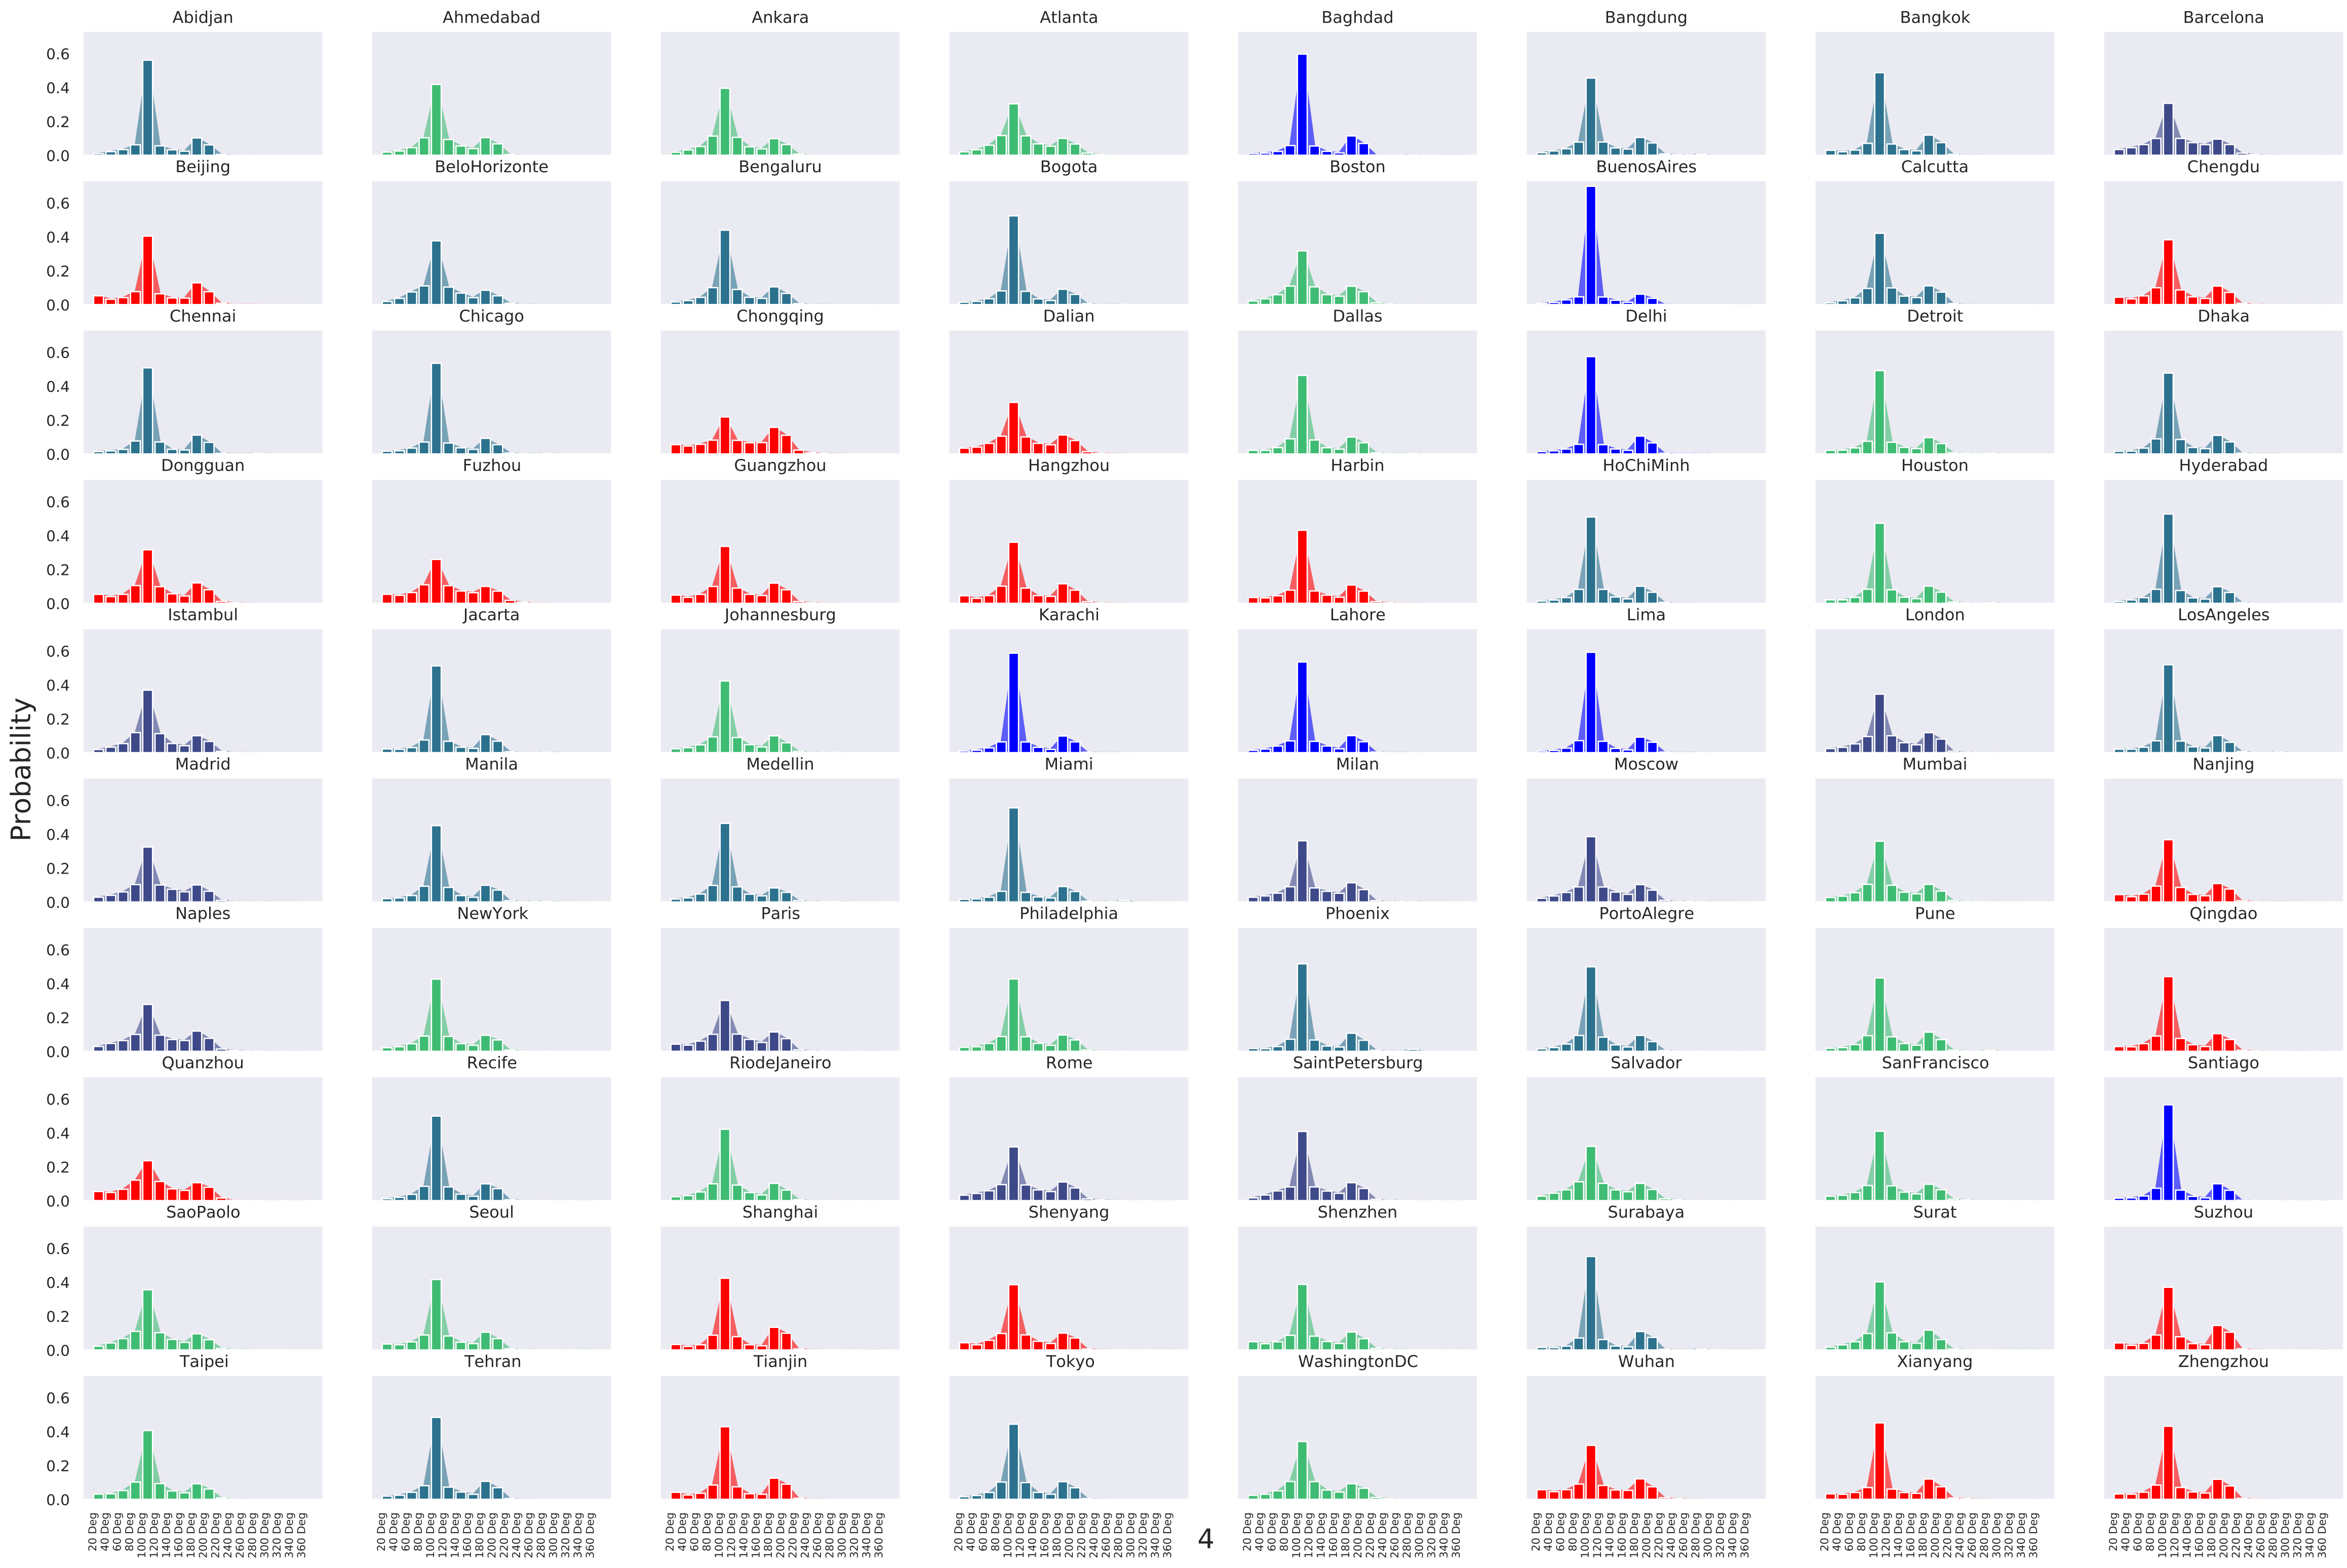

Figure S4: Silhouette score measure to find optimal number of clusters.

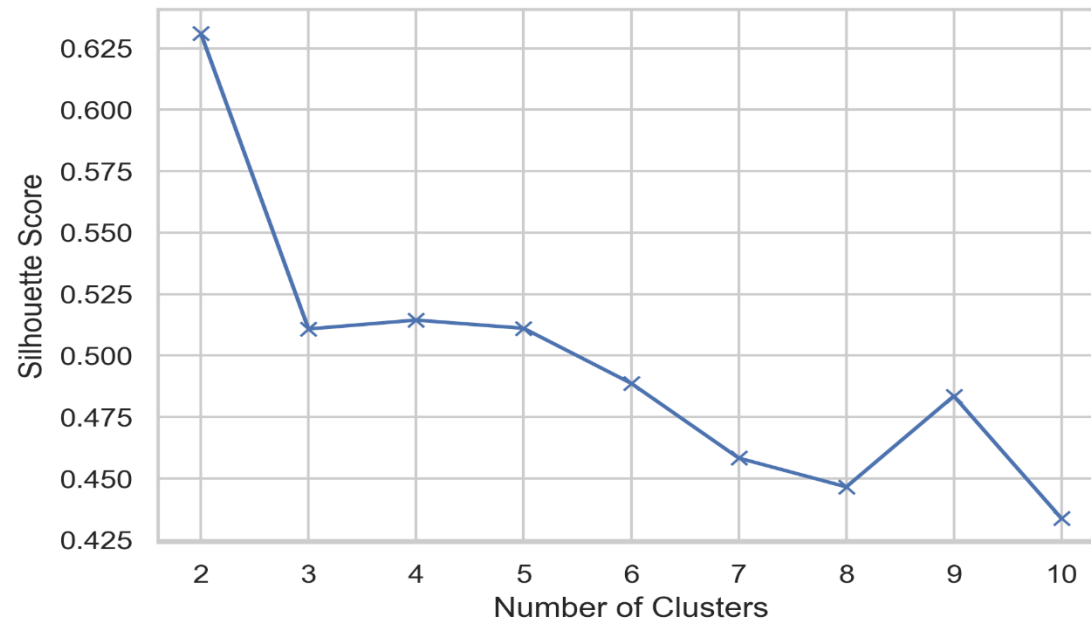

Figure S5: Sum of squared distance measure to find optimal number of clusters

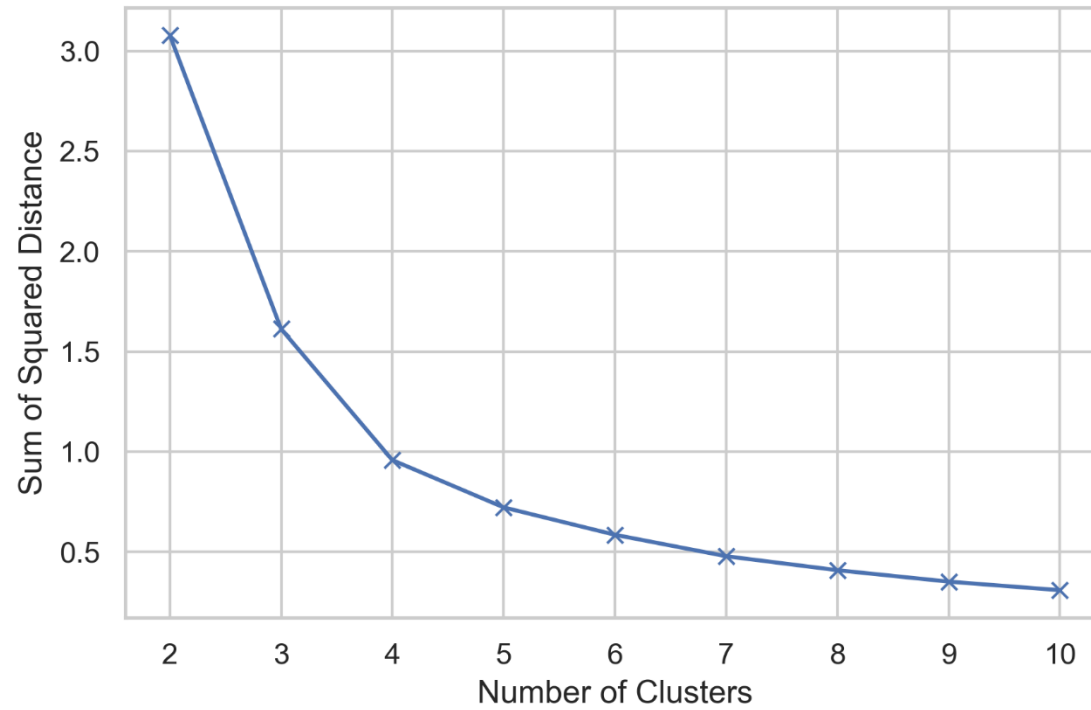

Supplement: s1 [file s1]
